# Supplementary material for: Theoretical insights into the structural, mechanical, and electronic properties of bcc-C40 carbon
Source: Royal Society of Chemistry journal article supplement (doi:10.1039/d4cp00149d), 2024-01-01
Supplement: d4cp00149d1.pdf [file d4cp00149d1.pdf]

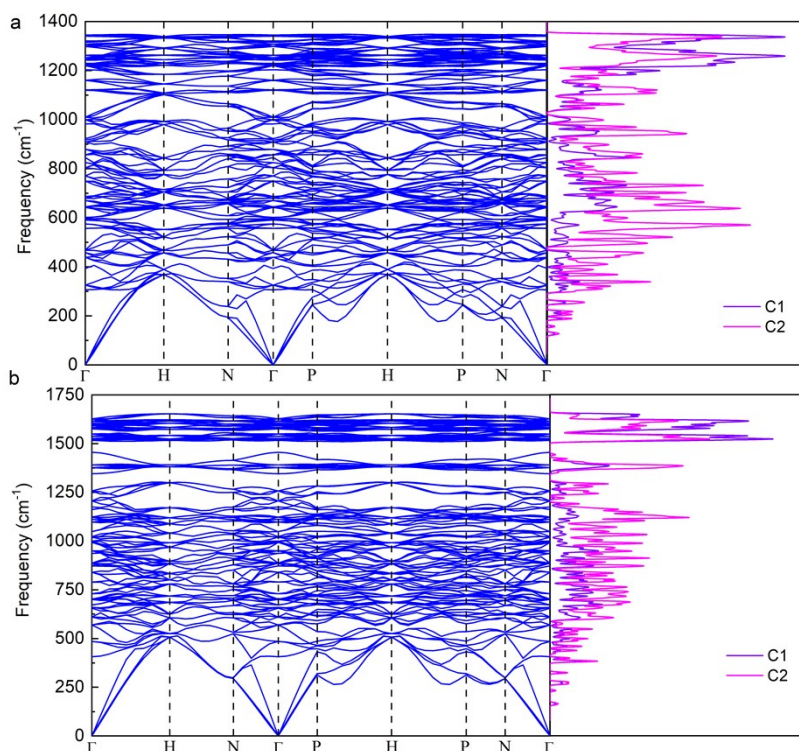

**Fig. S1.** Phonon dispersion curves and partial phonon density of states of bcc-C40 carbon at (a) ambient pressure and (b) 150 GPa, denoted by C1 (diatomic carbon), C2 (4-fold helical chains), respectively.

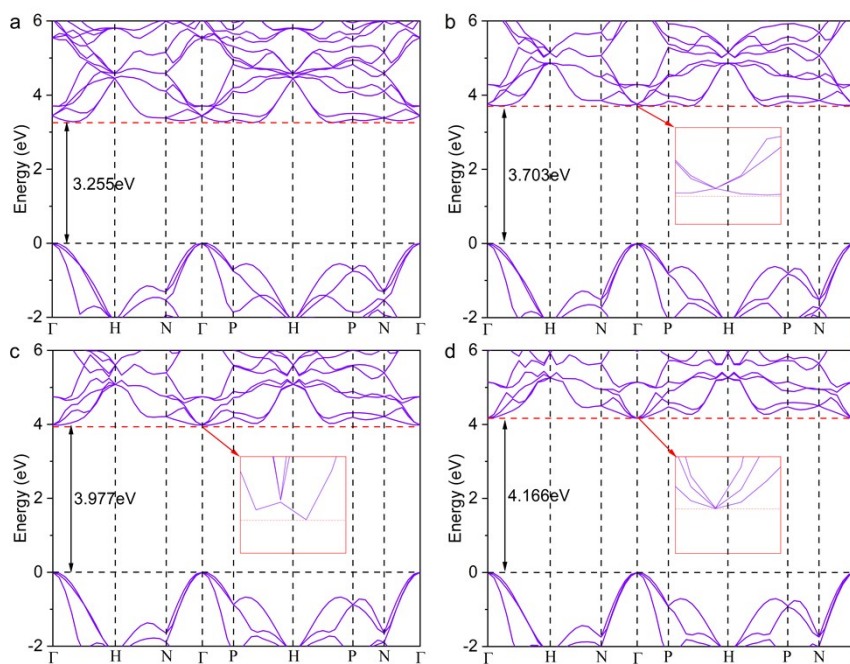

**Fig. S2.** Band structure with HSE06 method of bcc-C40 carbon at 0 GPa (a), 50 GPa (b), 100 GPa (c) and 150 GPa (d). The illustrations in the (b), (c) and (d) are near the lowest conduction band.

**Table S1.** Calculated bulk moduli ( $B$ , GPa), shear moduli ( $G$ , GPa),  $G/B$ , Vickers hardness  $H_V$  (GPa) based on Chen's<sup>1</sup> ( $H_V^{\text{Chen}}$ , GPa) and Tian's<sup>2</sup> model ( $H_V^{\text{Tian}}$ , GPa), and reference Vickers hardness ( $H_V^{\text{ref}}$ , GPa) for each of bcc-C40 carbon, C20-T, C96, T-carbon and diamond at ambient pressure.

| Structure | $B$ | $G$ | $H_V^{\text{Chen}}$ | $H_V^{\text{Tian}}$ | $H_V^{\text{ref}}$ |
|-----------|-----|-----|---------------------|---------------------|--------------------|
| bcc-C40   | 340 | 343 | 57.96               | 88.47               | -                  |
| C20-T     | 405 | 419 | 68.63               | 94.48               | 73.42 <sup>3</sup> |
| C96       | 270 | 236 | 37.72               | 78.85               | -                  |
| T-carbon  | 161 | 52  | 4.21                | 61.94               | 5.6 <sup>4</sup>   |
| diamond   | 451 | 547 | 99.44               | 98.22               | 98 <sup>5</sup>    |

1. X. Q. Chen, H. Niu, D. Li and Y. Li, *Intermetallics*, 2011, **19**, 1275-1281.
2. Y. Tian, B. Xu and Z. Zhao, *International Journal of Refractory Metals and Hard Materials*, 2012, **33**, 93-106.
3. J.-Q. Wang, C.-X. Zhao, C.-Y. Niu, Q. Sun and Y. Jia, *Journal of Physics: Condensed Matter*, 2016, **28**, 475402.
4. X. Q. Chen, H. Niu, C. Franchini, D. Li and Y. Li, *Physical Review B*, 2011, **84**.
5. J. Chen, P. Ying, Y. Gao, X. Wei, B. Li, Q. Huan and K. Luo, *Journal of Materials Science*, 2021, **56**, 17665-17673.
